# Supplementary material
Source: PubMed Central journal article supplement (PMC4547493)
Supplement: cm5b00856_si_001.pdf [file cm5b00856_si_001.pdf]

## Supplementary Information

### $^2\text{H}$ and $^{27}\text{Al}$ Solid-State NMR Study of the Local Environments in Al-Doped 2-Line Ferrihydrite, Goethite, and Lepidocrocite

Jongsik Kim, Andrew J. Ilott, Derek S. Middlemiss, Natasha A. Chernova, Nathan Pinney, Dane Morgan, and Clare P. Grey\*

| Configuration | Unscaled $^{27}\text{Al}$ shifts / $10^5$ ppm |           | Scaled $^{27}\text{Al}$ shifts / ppm |           |
|---------------|-----------------------------------------------|-----------|--------------------------------------|-----------|
|               | Al atom 1                                     | Al atom 2 | Al atom 1                            | Al atom 2 |
| Goethite      |                                               |           |                                      |           |
| Single        | 3.02                                          |           | 662                                  |           |
| 1NN           | 1.67                                          | 1.67      | 366                                  | 366       |
| 2NN           | 3.70                                          | 3.70      | 813                                  | 813       |
| 3NN           | 2.42                                          | 2.58      | 532                                  | 565       |
| Lepidocrocite |                                               |           |                                      |           |
| Single        | 5.20                                          |           | 4760                                 |           |
| 1NN           | 5.20                                          | 5.21      | 4690                                 | 4700      |
| 2NN           | 5.27                                          | 5.33      | 4750                                 | 4810      |
| 3NN           | 1.61                                          | 1.60      | 1450                                 | 1450      |

Table S1. Calculated  $^{27}\text{Al}$  unscaled and scaled hyperfine shifts for Al-doped goethite and lepidocrocite configurations with 35% Hartree-Fock exchange (results for 20% HF exchange displayed in main manuscript).

(a) **Goethite**, pristine  $^2\text{H}$  shift: 42 ppm (b) **Lepidocrocite**, pristine  $^2\text{H}$  shift: 380 ppm

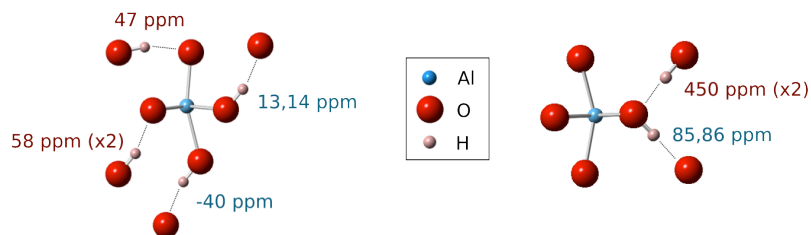

Figure S1. Results from the first principles calculation of the  $^2\text{H}$  hyperfine shifts using 35% Hartree-Fock exchange in (a) goethite and (b) lepidocrocite. The shifts for the unique  $^2\text{H}$  nucleus in the pristine material are quoted while the individual  $^2\text{H}$  shifts for sites surrounding a single Al dopant are labeled on the associated structures.

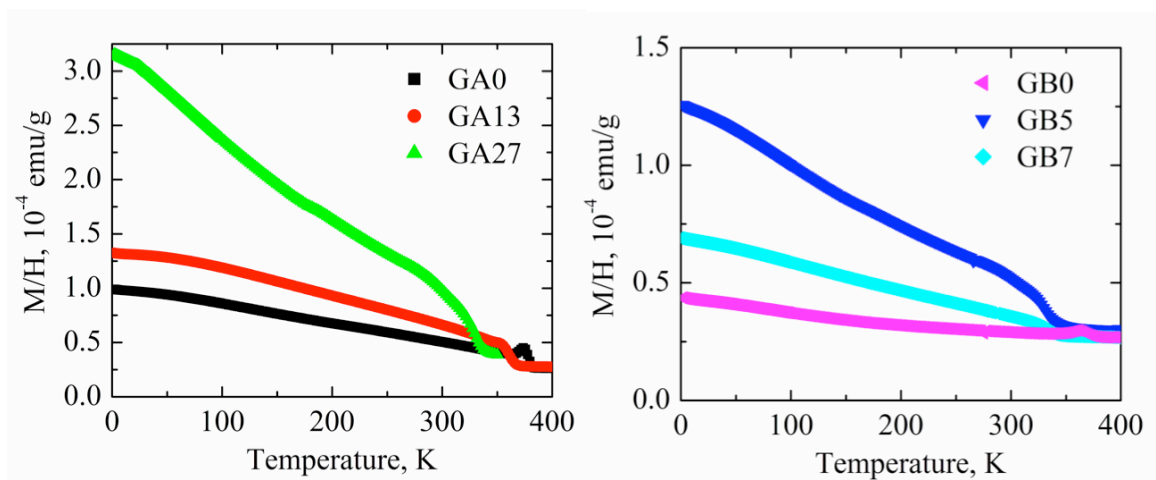

Figure S2. Magnetization curves for all of the goethite series as a function of temperature.
